# Supplementary material for: Clinical Efficacy of Repeated Applications of Local Drug Delivery and Adjunctive Agents in Nonsurgical Periodontal Therapy: A Systematic Review
Source: MDPI journal article supplement (doi:10.3390/antibiotics10101178), 2021-09-28
Supplement: s1 [file s1]

## Supplementay Materials

### Clinical Efficacy of Repeated Applications of Local Drug Delivery and Adjunctive Agents in Nonsurgical Periodontal Therapy: A Systematic Review

Oi Leng Tan, Syarida Hasnur Safii and Masfueh Razali \*

**File S1:** Search strategies for each electronic database.

#### PubMed (1979 to July 2021)

1. (((((periodontal diseases [mesh]) NOT periodontal cyst [mesh]) NOT gingival diseases [mesh]) NOT periapical diseases [mesh]) NOT peri-implantitis [mesh]) OR periodontitis [tw])
2. (dental prophylaxis [mesh] OR subgingival curettage [mesh] OR dental prophylaxis [tw] OR scaling root planing [tw] OR dental scaling [tw] OR root planing [tw] OR dental cleaning [tw] OR SRP [tw] OR scaling planing [tw] OR ultrasonic therapy [tw] OR ultrasonic therapy [mesh] OR ultrasonic scaling [tw] OR root surface debridement [tw] OR root surface instrumentation [tw] OR periodontal debridement [tw] OR nonsurgical [tw] OR non-surgical [tw]) NOT (ultrasonic surgical procedures [mesh]))
3. (randomized controlled trial[pt] OR controlled clinical trial [pt] OR randomized [tiab] OR placebo [tiab] OR clinical trials as topic [mesh:noexp] OR randomly [tiab] OR trial[ti] NOT (animals [mh] NOT humans [mh])) NOT (review [pt] OR systematic review [pt]) [Adapted from Lefebvre et al. (2019)]
4. (adjunct\* [tw]) AND (dental enamel proteins [mh] OR enamel matrix derivative\* [tw] OR Anti-infective agents [mh] OR antibiotic\* [tw] OR antiseptic\* [tw] OR antimicrobial\* [tw] OR antibacterial\*[tw] OR tetracycline [tw] OR chlorhexidine [tw] OR doxycycline [tw] OR metronidazole [tw] OR minocycline [tw] OR hyaluron\* [tw] OR probiotic\* [tw] OR photodynamic therap\* [tw])
5. 1 and 2 and 3 and 4

#### MEDLINE via OVID (1946 to July 2021)

1. exp Periodontal Diseases/ or periodonti\$.mp. or (periodontal adj3 pocket\$).mp. or "periodont\$ attachment loss".mp.

2. exp Dental Prophylaxis/ or exp subgingival curettage/ or exp ultrasonic therapy/ or ((dental or oral or teeth or tooth or subgingival) adj6 (scaling or scale\$ or curettage)).mp. or (dental prophylaxis or oral prophylaxis).mp. or (root adj (plane\$ or planing)).mp. or (periodontal adj debridement\$).mp. or (root surface adj debridement\$).mp. or (root surface adj instrumentation\$).mp. or (non?surgical adj3 periodontal).mp.
3. adjunct\$.mp.
4. exp Anti-infective agents/ or (anti?biotic\$ or anti?septic\$ or anti?bacterial\$ or anti?microbial\$).mp. or (tetracycline or chlorhexidine or doxycycline or metronidazole or minocycline or hyaluron\$ or photodynamic or enamel matrix derivative\$ or probiotic\$).mp.
6. randomized controlled trial.pt. or controlled clinical trial.pt. or randomized.ab. or placebo.ab. or drug therapy.fs. or randomly.ab. or trial.ab. or groups.ab. NOT (review.pt or systematic review.pt) [Adapted from Lefebvre et al. (2019)]
5. 1 and 2 and 3 and 4 and 5
6. (exp animal/ or animal.hw. or nonhuman/) not humans.sh.
7. 6 not 7

#### **EMBASE via OVID (1974 to July 2021)**

1. exp Periodontal Diseases/ or periodonti\$.mp. or (periodontal adj3 pocket\$).mp. or "periodont\$ attachment loss".mp.
2. exp Dental Prophylaxis/ or exp subgingival curettage/ or exp ultrasonic therapy/ or ((dental or oral or teeth or tooth or subgingival) adj6 (scaling or scale\$ or curettage)).mp. or (dental prophylaxis or oral prophylaxis).mp. or (root adj (plane\$ or planing)).mp. or (periodontal adj debridement\$).mp. or (root surface adj debridement\$).mp. or (root surface adj instrumentation\$).mp. or (non?surgical adj3 periodontal).mp.
3. adjunct\$.mp.
4. exp Anti-infective agents/ or (anti?biotic\$ or anti?septic\$ or anti?bacterial\$ or anti?microbial\$).mp. or (tetracycline or chlorhexidine or doxycycline or metronidazole or minocycline or hyaluron\$ or photodynamic or enamel matrix derivative\$ or probiotic\$).mp.
5. Randomized controlled trial/ or Controlled clinical study/ or random\$.ti,ab. or randomisation/ or intermethod comparison/ or placebo.ti,ab. or (compare or compared or comparison).ti. or ((evaluated or evaluate or evaluating or assessed or assess) and (compare or compared or comparing or comparison)).ab. or (open adj label).ti,ab. or ((double or single

or doubly or singly) adj (blind or blinded or blindly)).ti,ab. or double blind procedure/ or parallel group\$1.ti,ab. or (crossover or cross over).ti,ab. or ((assign\$ or match or matched or allocation) adj5 (alternate or group\$1 or intervention\$1 or patient\$1 or subject\$1 or participant\$1)).ti,ab. or (assigned or allocated).ti,ab. or (controlled adj7 (study or design or trial)).ti,ab. or (volunteer or volunteers).ti,ab. or human experiment/ or trial.ti. [Adapted from Lefebvre et al. (2019)]

6. random\$ adj sampl\$ adj7 (cross section\$ or questionnaire\$1 or survey\$ or database\$1).ti,ab. not (comparative study/ or controlled study/ or randomi?ed controlled.ti,ab. or randomly assigned.ti,ab.) or Cross-sectional study/ not (randomized controlled trial/ or controlled clinical study/ or controlled study/ or randomi?ed controlled.ti,ab. or control group\$1.ti,ab.) or (((case adj control\$) and random\$) not randomi?ed controlled).ti,ab. or (Systematic review not (trial or study)).ti. or (nonrandom\$ not random\$).ti,ab. or (Random field\$).ti,ab. or (random cluster adj3 sampl\$).ti,ab. or (review.ab. and review.pt.) not trial.ti. or (we searched).ab. and (review.ti. or review.pt.) or (update review).ab. or (databases adj4 searched).ab. or (rat or rats or mouse or mice or swine or porcine or murine or sheep or lambs or pigs or piglets or rabbit or rabbits or cat or cats or dog or dogs or cattle or bovine or monkey or monkeys or trout or marmoset\$1).ti. and animal experiment/ or Animal experiment/ not (human experiment/ or human/)
7. 5 not 6
8. 1 and 2 and 3 and 4 and 7

#### **Cochrane Central Register of Controlled Clinical Trials (CENTRAL) (inception to July 2021)**

1. MeSH descriptor: [Periodontal Diseases] explode all trees
2. (periodonti\*) OR (periodontal near/3 pocket\*) OR (periodont\* attachment loss)
3. #1 or #2
4. MeSH descriptor: [Dental Prophylaxis] explode all trees
5. (dental or oral or teeth or tooth or subgingival) AND (scaling or scale\* or curettage)
6. (dental prophylaxis OR oral prophylaxis) OR (root\* NEXT plane\* or root\* NEXT planing) OR (periodontal NEXT debridement\*)
7. (root surface NEXT debridement\*) OR (root surface NEXT instrumentation\*) OR ((non surgical or non-surgical or nonsurgical) near/3 periodontal)
8. #4 or #5 or #6 or #7
9. (adjunct\*)

10. MeSH descriptor: [Anti-Infective Agents] explode all trees
11. (anti biotic\* or anti septic\* or anti bacterial\* or anti microbial\* or antibiotic\* or antiseptic\* or antibacterial\* or antimicrobial\* or anti-biotic\* or anti-septic\* or anti-bacterial\* or anti-microbial\*) OR (tetracycline or chlorhexidine or doxycycline or metronidazole or minocycline or hyaluron\* or photodynamic or enamel matrix derivative\* or probiotic\*)
12. #10 or #11
13. #3 and #8 and #9 and #12

#### **Web of Science (All databases) (1980 to July 2021)**

1. TS=((periodonti\*) OR (periodontal near/3 pocket\*) OR (periodont\* attachment loss))
2. TS=((dental or oral or teeth or tooth or subgingival) AND (scaling or scale\* or curettage))
3. TS=((dental prophylaxis OR oral prophylaxis) OR (root\* NEAR/1 plane\* or root\* NEAR/1 planing) OR (periodontal NEAR/1 debridement\*))
4. TS=((root surface debridement\*) OR (root surface instrumentation\*) or (non surgical or non-surgical or nonsurgical))
5. #4 OR #3 OR #2
6. TS=(anti biotic\* or anti septic\* or anti bacterial\* or anti microbial\* or antibiotic\* or antiseptic\* or antibacterial\* or antimicrobial\* or anti-biotic\* or anti-septic\* or anti-bacterial\* or anti-microbial\*)
7. TS=(tetracycline or chlorhexidine or doxycycline or metronidazole or minocycline or hyaluron\* or photodynamic or enamel matrix derivative\* or probiotic\*)
8. #7 OR #6
9. TS=(adjunct\*)
10. TS=(randomized controlled trial or randomised controlled clinical trial OR random\* OR placebo OR clinical trial\*)
11. TI=(review)
12. #10 AND #9 AND #8 AND #5 AND #1
13. #12 NOT #11
14. TS=(animal\* NOT human\*)
15. #13 NOT #14

#### **US National Institutes of Health Ongoing Trials Register (ClinicalTrials.gov) (inception to July 2021)**

Advanced search:

Condition: periodontitis

Other terms: adjunct

Applied filter: Interventional

**World Health Organization International Clinical Trials Registry Platform (inception to July 2021)**

Periodontitis AND adjunct

**ProQuest Dissertations & Theses Global (1879 to July 2021)**

1. ((periodonti\*) OR ("periodontal near/3 pocket\*") OR ("periodont\* attachment loss")) NOT ti(implant\* or gingivitis or mucositis or orthodont\* or endodont\*)
2. ("dental prophylaxis" OR "oral prophylaxis") OR ("root\* NEAR/1 plane\*" OR "root\* NEAR/1 planing") OR ("periodontal NEAR/1 debridement\*") OR ("root surface debridement\*") OR ("root surface instrumentation\*") OR ("non surgical" or "non-surgical" or "nonsurgical") OR (dental or oral or teeth or tooth or subgingival) AND (scaling or scale\* or curettage)
3. adjunct\*
4. (anti?biotic\* or anti?septic\* or anti?bacterial\* or anti?microbial\*) OR (tetracycline or chlorhexidine or doxycycline or metronidazole or minocycline or hyaluron\* or photodynamic or enamel matrix derivative\* or probiotic\*)
5. randomi?ed control\* trial OR random\* OR placebo OR clinical trial\*
6. ti(review OR (in?vitro) OR (ex?vivo) OR (in?vivo) OR (cross?section\*) OR retrospective OR observational OR experiment\* OR literature)
7. s1 and s2 and s3 and s4 and s5
8. s7 not s6
9. su((animal\*) NOT (human\*))
10. s8 not s9

**Table S1. Studies excluded after full-text screening and reasons for exclusion**

| No | Author(s)                                                                   | Year | Title of study                                                                                                                                                                                        | Journal                                                                | Volume | Issue | Page      | Exclusion reason(s)                |
|----|-----------------------------------------------------------------------------|------|-------------------------------------------------------------------------------------------------------------------------------------------------------------------------------------------------------|------------------------------------------------------------------------|--------|-------|-----------|------------------------------------|
| 1  | Ahamed, S.; Jalaluddin, M.; Khalid, I.; Moon, N.; Shaf, T. K.; Ali, F. M.   | 2013 | The use of controlled release locally delivered 10% doxycycline hyclate gel as an adjunct to scaling and root planing in the treatment of chronic periodontitis: clinical and microbiological results | Journal of Contemporary Dental Practice                                | 14     | 6     | 1080-1086 | No randomisation                   |
| 2  | Aimetti, M.; Romano, F.; Guzzi, N.; Carnevale, G.                           | 2011 | One-stage full-mouth disinfection as a therapeutic approach for generalized aggressive periodontitis                                                                                                  | Journal of Periodontology                                              | 82     | 6     | 845-853   | No control                         |
| 3  | Aimetti, M.; Romano, F.; Torta, I.; Cirillo, D.; Caposio, P.; Romagnoli, R. | 2004 | Debridement and local application of tetracycline-loaded fibres in the management of persistent periodontitis: Results after 12 months                                                                | Journal of Clinical Periodontology                                     | 31     | 3     | 166-172   | Discontinued adjunct               |
| 4  | Akincıbay, H., Şenel, S., & Ay, Z. Y.                                       | 2007 | Application of chitosan gel in the treatment of chronic periodontitis.                                                                                                                                | Journal of Biomedical Materials Research. Part B: Applied Biomaterials | 80     | 2     | 290-296   | Adjunct not commercially available |
| 5  | Al Habashneh, R., Mashal, M. A., Khader, Y., & Qudah, R.                    | 2019 | Clinical and biological effects of adjunctive photodynamic therapy in refractory periodontitis                                                                                                        | Journal of Lasers in Medical Sciences                                  | 10     | 2     | 139-145   | No randomisation                   |

|    |                                                                                                                              |      |                                                                                                                                                                 |                                                               |    |   |         |                                                   |
|----|------------------------------------------------------------------------------------------------------------------------------|------|-----------------------------------------------------------------------------------------------------------------------------------------------------------------|---------------------------------------------------------------|----|---|---------|---------------------------------------------------|
| 6  | Balata, M. L., Andrade, L. P. D., Santos, D. B. N., Cavalcanti, A. N., Tunes, U. D. R., Ribeiro, E. D. P., & Bittencourt, S. | 2013 | Photodynamic therapy associated with full-mouth ultrasonic debridement in the treatment of severe chronic periodontitis: a randomized-controlled clinical trial | Journal of Applied Oral Science: Revista FOB                  | 21 | 2 | 208-214 | Failing sites retreated per initial basic therapy |
| 7  | Bizzarro, S., Van der Velden, U., & Loos, B. G.                                                                              | 2016 | Local disinfection with sodium hypochlorite as adjunct to basic periodontal therapy: A randomized controlled trial                                              | Journal of Clinical Periodontology                            | 43 | 9 | 778-788 | Used systemic antimicrobials                      |
| 8  | Bloml f, L., Bergman, E., Forsg rdh,  ., Foss, L., Larsson, A., Sj berg, B., Uhlander, L., et al.                            | 2000 | A clinical study of root surface conditioning with an EDTA gel. I. Nonsurgical periodontal treatment.                                                           | International Journal of Periodontics & Restorative Dentistry | 20 | 6 | 561-565 | Experimental adjunct                              |
| 9  | Bosco, J., Lopes, B., Bosco, A. F., Spolidorio, D. M., & Marcantonio, R. A.                                                  | 2009 | Local application of tetracycline solution with a microbrush: An alternative treatment for persistent periodontitis                                             | Quintessence International                                    | 40 | 1 | 29-40   | Adjunct not commercially available                |
| 10 | Bundidpun, P., Srisuwantha, R., & Laosrisin, N.                                                                              | 2018 | Clinical effects of photodynamic therapy as an adjunct to full-mouth ultrasonic scaling and root planing in treatment of chronic periodontitis                  | Laser Therapy                                                 | 27 | 1 | 33-39   | Adjuncts administered one week after SRP          |
| 11 | Cappuyns, I., Cionca, N., Wick, P., Giannopoulou, C., & Mombelli, A.                                                         | 2012 | Treatment of residual pockets with photodynamic therapy, diode laser, or deep                                                                                   | Lasers in Medical Science                                     | 27 | 5 | 979-986 | Not used as adjunct                               |

|    |                                                                                                                  |      |                                                                                                                                                                                             |                                             |    |   |         |                     |
|----|------------------------------------------------------------------------------------------------------------------|------|---------------------------------------------------------------------------------------------------------------------------------------------------------------------------------------------|---------------------------------------------|----|---|---------|---------------------|
|    |                                                                                                                  |      | scaling. A randomized, split-mouth controlled clinical trial                                                                                                                                |                                             |    |   |         |                     |
| 12 | Carvalho, V.F., Andrade, P.V., Rodrigues, M.F., Hirata, M.H., Hirata, R.D., Pannuti, C.M., De Micheli, G. et al. | 2015 | Antimicrobial photodynamic effect to treat residual pockets in periodontal patients: a randomized controlled clinical trial                                                                 | Journal of Clinical Periodontology          | 42 | 5 | 440-447 | Not used as adjunct |
| 13 | Chiang, C. P., Hsieh, O., Tai, W. C., Chen, Y. J., & Chang, P. C.                                                | 2019 | Clinical outcomes of adjunctive indocyanine green-diode lasers therapy for treating refractory periodontitis: A randomized controlled trial with in vitro assessment.                       | Journal of The Formosan Medical Association |    |   |         | Incomplete data     |
| 14 | Cortelli, J.R., Aquino, D.R., Cortelli, S.C., Carvalho-F, J., Roman-Torres, C.V., & Costa, F.O.                  | 2008 | A double-blind randomized clinical trial of subgingival minocycline for chronic periodontitis.                                                                                              | Journal of Oral Science                     | 50 | 3 | 259-265 | No CAL data         |
| 15 | Cortelli, J. R., Querido, S. M. R., Aquino, D. R., Ricardo, L. H., & Pallos, D.                                  | 2006 | Longitudinal clinical evaluation of adjunct minocycline in the treatment of chronic periodontitis                                                                                           | Journal of Periodontology                   | 77 | 2 | 161-166 | No CAL data         |
| 16 | Cortelli, S. C., Cavallini, F., Alves, M. F. R., Bezerra, A. A., Queiroz, C. S., & Cortelli, J. R.               | 2009 | Clinical and microbiological effects of an essential-oil-containing mouth rinse applied in the “one-stage full-mouth disinfection” protocol—a randomized doubled-blinded preliminary study. | Clinical Oral Investigations                | 13 | 2 | 189-194 | No CAL data         |



|    |                                                                                                                                  |      |                                                                                                                                                     |                                            |     |   |         |                            |
|----|----------------------------------------------------------------------------------------------------------------------------------|------|-----------------------------------------------------------------------------------------------------------------------------------------------------|--------------------------------------------|-----|---|---------|----------------------------|
| 17 | Cortelli, S.C., Cortelli, J.R., Holzhausen, M., Franco, G.C.N., Rebelo, R.Z., Sonagere, A.S., Queiroz, C.D.S. et al.             | 2009 | Essential oils in one-stage full-mouth disinfection: double-blind, randomized clinical trial of long-term clinical, microbial and salivary effects. | Journal of Clinical Periodontology         | 36  | 4 | 333-342 | No CAL data                |
| 18 | Cosyn, Jan; Wyn, Iris; De Rouck, Tim; Sabzevar, Mehran Moradi                                                                    | 2006 | Long-term clinical effects of a chlorhexidine varnish implemented treatment strategy for chronic periodontitis                                      | Journal of Periodontology                  | 77  | 3 | 406-415 | No CAL data                |
| 19 | da Cruz Andrade, P.V., Alves, V.T.E., de Carvalho, V.F., Rodrigues, M.D.F., Pannuti, C.M., Holzhausen, M., De Micheli, G. et al. | 2017 | Photodynamic therapy decrease immune-inflammatory mediators levels during periodontal maintenance                                                   | Lasers in Medical Science                  | 32  | 1 | 9-17    | Not used as adjunct        |
| 20 | D'aiuto, F., Parkar, M., Nibali, L., Suvan, J., Lessem, J., & Tonetti, M. S.                                                     | 2006 | Periodontal infections cause changes in traditional and novel cardiovascular risk factors: Results from a randomized controlled clinical trial      | American Heart Journal                     | 151 | 5 | 977-984 | No PPD/CAL data            |
| 21 | Dannewitz, B., Lippert, K., Lang, N. P., Tonetti, M. S., & Eickholz, P.                                                          | 2009 | Supportive periodontal therapy of furcation sites: Non-surgical instrumentation with or without topical doxycycline                                 | Journal of Clinical Periodontology         | 36  | 6 | 514-522 | Subset of Tonetti 2012     |
| 22 | De Lissovoy, G., Rentz, A. M., Dukes, E. M., Eaton, C.                                                                           | 1999 | The cost-effectiveness of a new chlorhexidine delivery system in the treatment of adult periodontitis                                               | Journal of the American Dental Association | 130 | 6 | 855-862 | Extension of Jeffcoat 1998 |

|    |                                                                                                                               |      |                                                                                                                                                                            |                                                                                                                                               |                 |   |         |                                                   |
|----|-------------------------------------------------------------------------------------------------------------------------------|------|----------------------------------------------------------------------------------------------------------------------------------------------------------------------------|-----------------------------------------------------------------------------------------------------------------------------------------------|-----------------|---|---------|---------------------------------------------------|
|    | A., Jeffcoat, M. K., Killoy, W. J., & Finkelman, R. D.                                                                        |      |                                                                                                                                                                            |                                                                                                                                               |                 |   |         |                                                   |
| 23 | Dean, J. W., Branch-Mays, G. L., Hart, T. C., Reinhardt, R. A., Shapiro, B., Santucci, E. A., & Lessem, J.                    | 2003 | Topically applied minocycline microspheres: why it works.                                                                                                                  | Compendium of Continuing Education in Dentistry                                                                                               | 24              | 4 | 247-258 | No control                                        |
| 24 | Del Peloso Ribeiro, É., Bittencourt, S., Ambrosano, G. M. B., Nociti Jr, F. H., Sallum, E. A., Sallum, A. W., & Casati, M. Z. | 2006 | Povidone-iodine used as an adjunct to non-surgical treatment of furcation involvements.                                                                                    | Journal of Periodontology                                                                                                                     | 77              | 2 | 211-217 | Failing sites retreated per initial basic therapy |
| 25 | Drisko, C.L., Cobb, C.M., Killoy, W.J., Michalowicz, B.S., Pihlstrom, B.L., Lowenguth, R.A., Caton, J.G., et al.              | 1995 | Evaluation of periodontal treatments using controlled-release tetracycline fibers: clinical response                                                                       | Journal of Periodontology                                                                                                                     | 66              | 8 | 692-699 | Discontinued adjunct                              |
| 26 | DRKS00005389                                                                                                                  | 2014 | Clinical outcomes of adjunctive antimicrobial photodynamic therapy in the treatment of patients with severe chronic periodontitis - a controlled randomized clinical trial | <a href="http://www.who.int/trialsearch/trial2.aspx?trialid=drks00005389">http://www.who.int/trialsearch/trial2.aspx?trialid=drks00005389</a> | Incomplete data |   |         |                                                   |
| 27 | Eickholz, P., Kim, T.S., Bürklin, T., Schacher, B.,                                                                           | 2002 | Non-surgical periodontal therapy with adjunctive topical doxycycline: a double-blind randomized controlled multicenter study                                               | Journal of Clinical Periodontology                                                                                                            | 29              | 2 | 108-117 | 15% DH not commercially available                 |

|    |                                                                                                               |      |                                                                                                                                                                                                                                               |                                    |    |    |         |                                          |
|----|---------------------------------------------------------------------------------------------------------------|------|-----------------------------------------------------------------------------------------------------------------------------------------------------------------------------------------------------------------------------------------------|------------------------------------|----|----|---------|------------------------------------------|
|    | Renggli, H.H., Schaecken, M.T., Holle, R., et al.                                                             |      |                                                                                                                                                                                                                                               |                                    |    |    |         |                                          |
| 28 | Feng, H.S., Bernardo, C.C., Sonoda, L.L., Hayashi, F., Romito, G.A., De Lima, L.A.P.A., Lotufo, R.F.M. et al. | 2011 | Subgingival ultrasonic instrumentation of residual pockets irrigated with essential oils: a randomized controlled trial.                                                                                                                      | Journal of Clinical Periodontology | 38 | 7  | 637-643 | Adjuncts administered one week after SRP |
| 29 | Flemmig, T. F., Weinacht, S., Rüdiger, S., Rumetsch, M., Jung, A., & Klaiber, B.                              | 1996 | Adjunctive controlled topical application of tetracycline HCl in the treatment of localized persistent or recurrent periodontitis: Effects on clinical parameters and elastase- $\alpha$ 1-proteinase inhibitor in gingival crevicular fluid. | Journal of Clinical Periodontology | 23 | 10 | 914-921 | Discontinued adjunct                     |
| 30 | Friesen, L. R., Williams, K. B., Krause, L. S., & Killoy, W. J.                                               | 2002 | Controlled local delivery of tetracycline with polymer strips in the treatment of periodontitis.                                                                                                                                              | Journal of Periodontology          | 73 | 1  | 13-19   | Adjunct not commercially available       |
| 31 | Fulvi, L., Polizzi, E. & Calderini, A.                                                                        | 2011 | Effectiveness of local antibiotic therapy plus scaling/root-planing: An experimental split-mouth study                                                                                                                                        | Prevenzione E Assistenza Dentale   | 37 | 2  | 33-43   | Adjunct not commercially available       |
| 32 | Garrett, S., Johnson, L., Drisko, C.H., Adams, D.F., Bandt, C., Beiswanger, B., Bogle, G., et al.             | 1999 | Two multi-center studies evaluating locally delivered doxycycline hyclate, placebo control, oral hygiene, and scaling and root planing in the treatment of periodontitis.                                                                     | Journal of Periodontology          | 70 | 5  | 490-503 | Not used as adjunct                      |

|    |                                                                                                               |      |                                                                                                                                                                                                                                                                           |                                    |    |    |           |                                         |
|----|---------------------------------------------------------------------------------------------------------------|------|---------------------------------------------------------------------------------------------------------------------------------------------------------------------------------------------------------------------------------------------------------------------------|------------------------------------|----|----|-----------|-----------------------------------------|
| 33 | Garrett, S., Adams, D.F., Bogle, G., Donly, K., Hastings Drisko, C., Hallmon, W.W., Brady Hancock, E., et al. | 2000 | The effect of locally delivered controlled-release doxycycline or scaling and root planing on periodontal maintenance patients over 9 months.                                                                                                                             | Journal of Periodontology          | 71 | 1  | 22-30     | Subset of Garrett 1999                  |
| 34 | Giannelli, M., Formigli, L., Lorenzini, L., & Bani, D.                                                        | 2012 | Combined photoablative and photodynamic diode laser therapy as an adjunct to non-surgical periodontal treatment. A randomized split-mouth clinical trial                                                                                                                  | Journal of Clinical Periodontology | 39 | 10 | 962-970   | Adjunct administered one week after SRP |
| 35 | Giannelli, M., Formigli, L., Lorenzini, L., & Bani, D.                                                        | 2015 | Efficacy of combined photoablative-photodynamic diode laser therapy adjunctive to scaling and root planing in periodontitis: randomized split-mouth trial with 4-year follow-up                                                                                           | Photomedicine and Laser Surgery    | 33 | 9  | 473-480   | Adjunct administered one week after SRP |
| 36 | Giannelli, M., Materassi, F., Fossi, T., Lorenzini, L., & Bani, D.                                            | 2018 | Treatment of severe periodontitis with a laser and light-emitting diode (LED) procedure adjunctive to scaling and root planing: a double-blind, randomized, single-center, split-mouth clinical trial investigating its efficacy and patient-reported outcomes at 1 year. | Lasers in Medical Science          | 33 | 5  | 991-1002  | Adjunct administered one week after SRP |
| 37 | Giannopoulou, C., Cappuyns, I., Cancela, J., Cionca, N., & Mombelli, A.                                       | 2012 | Effect of photodynamic therapy, diode laser, and deep scaling on cytokine and acute-phase protein levels in gingival crevicular fluid of residual periodontal pockets                                                                                                     | Journal of Periodontology          | 83 | 8  | 1018-1027 | Not used as adjunct                     |

|    |                                                                                                               |      |                                                                                                                                                                                      |                                                                         |    |   |           |                                                   |
|----|---------------------------------------------------------------------------------------------------------------|------|--------------------------------------------------------------------------------------------------------------------------------------------------------------------------------------|-------------------------------------------------------------------------|----|---|-----------|---------------------------------------------------|
| 38 | Goh, E. X., Tan, K. S., Chan, Y. H., & Lim, L. P.                                                             | 2017 | Effects of root debridement and adjunctive photodynamic therapy in residual pockets of patients on supportive periodontal therapy: A randomized split-mouth trial                    | Photodiagnosis And Photodynamic Therapy                                 | 18 |   | 342-348   | Failing sites retreated per initial basic therapy |
| 39 | Gonzales, J. R., Harnack, L., Schmitt-Corsitto, G., Boedeker, R. H., Chakraborty, T., Domann, E., & Meyle, J. | 2011 | A novel approach to the use of subgingival controlled-release chlorhexidine delivery in chronic periodontitis: A randomized clinical trial                                           | Journal of Periodontology                                               | 82 | 8 | 1131-1139 | Adjunct administered before SRP                   |
| 40 | Gopinath, V., Ramakrishnan, T., Emmadi, P., Ambalavanan, N., & Mammen, B.                                     | 2009 | Effect of a controlled release device containing minocycline microspheres on the treatment of chronic periodontitis: A comparative study                                             | Journal of Indian Society of Periodontology                             | 13 | 2 | 79        | No mention of method of randomisation             |
| 41 | Grzech-Leśniak, K., Gaspirc, B., & Sculean, A.                                                                | 2019 | Clinical and microbiological effects of multiple applications of antibacterial photodynamic therapy in periodontal maintenance patients. A randomized controlled clinical study.     | Photodiagnosis And Photodynamic Therapy                                 | 27 |   | 44-50     | No CAL data                                       |
| 42 | Hagiwara, S., Iida, M., & Ishikawa, I.                                                                        | 1993 | Clinical and microbiological study concerning effects of scaling and root planing. 2. The effects of mechanical debridement until one year and of minocycline application topically. | Kokubyo Gakkai Zasshi. The Journal of The Stomatological Society, Japan | 60 | 2 | 301-312   | No mention of method of randomisation             |

|    |                                                                                                             |      |                                                                                                                                                                        |                                                   |     |    |           |                                                               |
|----|-------------------------------------------------------------------------------------------------------------|------|------------------------------------------------------------------------------------------------------------------------------------------------------------------------|---------------------------------------------------|-----|----|-----------|---------------------------------------------------------------|
| 43 | Henke, C.J.; Genco, R.J.; Killoy, W.J.; Miller, D.P.; Evans, C.J.; Finkelman, R.D.; Villa, K.F. et al.      | 2001 | An economic evaluation of a chlorhexidine chip for treating chronic periodontitis: the CHIP (chlorhexidine in periodontitis) study                                     | Journal of The American Dental Association (1939) | 132 | 11 | 1557-1569 | No final PPD/CAL reported                                     |
| 44 | Ioannou, I., Dimitriadis, N., Papadimitriou, K., Vouros, I., Sakellari, D., & Konstantinidis, A.            | 2011 | The effect of locally delivered doxycycline in the treatment of chronic periodontitis. A clinical and microbiological cohort study.                                    | Journal of Oral & Maxillofacial Research          | 1   | 4  | e1        | No randomisation, no control                                  |
| 45 | Jentsch, H.R., Rocuzzo, M., Marini, L., Kasaj, A., Fimmers, R., Jepsen, S.                                  | 2018 | 0059: Flapless application of enamel matrix derivative (EMD) as an adjunct to scaling and root planing – a multicenter RCT                                             | Journal of Clinical Periodontology                | 45  |    | 26-27     | Less than 6 months duration                                   |
| 46 | Jeffcoat, M. K., Palcanis, K. G., Weatherford, T. W., Reese, M., Geurs, N. C., & Flashner, M.               | 2000 | Use of a biodegradable chlorhexidine chip in the treatment of adult periodontitis: clinical and radiographic findings.                                                 | Journal of Periodontology                         | 71  | 2  | 256-262   | Subset of Jeffcoat 1998                                       |
| 47 | Jeffcoat, M.K., Bray, K.S., Ciancio, S.G., Dentino, A.R., Fine, D.H., Gordon, J.M., Gunsolley, J.C., et al. | 1998 | Adjunctive use of a subgingival controlled-release chlorhexidine chip reduces probing depth and improves attachment level compared with scaling and root planing alone | Journal of Periodontology                         | 69  | 9  | 989-997   | Only adjunct repeated, not SRP; possible bias towards adjunct |
| 48 | Jones, A. A., Kornman, K. S., Newbold, D. A., & Manwell, M. A.                                              | 1994 | Clinical and microbiological effects of controlled-release locally delivered minocycline in periodontitis                                                              | Journal of Periodontology                         | 65  | 11 | 1058-1066 | Adjunct not commercially available                            |

|    |                                                                                                           |      |                                                                                                                                                                      |                                                   |     |         |           |                                    |
|----|-----------------------------------------------------------------------------------------------------------|------|----------------------------------------------------------------------------------------------------------------------------------------------------------------------|---------------------------------------------------|-----|---------|-----------|------------------------------------|
| 49 | Kanoriya, D., Singhal, S., Garg, V., Pradeep, A. R., Garg, S., & Kumar, A.                                | 2018 | Clinical efficacy of subgingivally-delivered 0.75% boric acid gel as an adjunct to mechanotherapy in chronic periodontitis: A randomized, controlled clinical trial. | Journal of Investigative and Clinical Dentistry   | 9   | e1227-1 |           | Adjunct not commercially available |
| 50 | Kerry, G.                                                                                                 | 1994 | Tetracycline-loaded fibers as adjunctive treatment in periodontal disease.                                                                                           | Journal of The American Dental Association (1939) | 125 | 9       | 1199-1203 | Discontinued adjunct               |
| 51 | Killeen, A. C., Harn, J. A., Erickson, L. M., Yu, F., & Reinhardt, R. A.                                  | 2016 | Local minocycline effect on inflammation and clinical attachment during periodontal maintenance: Randomized clinical trial                                           | Journal of Periodontology                         | 87  | 10      | 1149-1157 | Original study of Killeen 2018     |
| 52 | Killooy, W. J.                                                                                            | 1999 | Assessing the effectiveness of locally delivered chlorhexidine in the treatment of periodontitis                                                                     | Journal of The American Dental Association (1939) | 130 | 4       | 567-570   | Review                             |
| 53 | Kim, T. S., Burklin, T., Schacher, B., Ratka-Kruger, P., Schaecken, M. T., Renggli, H. H., & Eickholz, P. | 2003 | Local application of antibiotics versus mechanical debridement in supportive periodontal treatment.                                                                  | Deutsche Zahnärztliche Zeitschrift                | 58  | 10      | 579-583   | Not used as adjunct                |
| 54 | Kinane, D. F., & Radvar, M.                                                                               | 1999 | A six-month comparison of three periodontal local antimicrobial therapies in persistent periodontal pockets                                                          | Journal of Periodontology                         | 70  | 1       | 1-7       | Discontinued adjunct               |
| 55 | Kolbe, M.F., Ribeiro, F.V., Luchesi, V.H., Casarin,                                                       | 2014 | Photodynamic therapy during supportive periodontal care: clinical, microbiologic,                                                                                    | Journal of Periodontology                         | 85  | 8       | e277-e286 | Not used as adjunct                |

|    |                                                                                        |      |                                                                                                                                                                                                                                      |                                                                      |    |   |           |                                      |
|----|----------------------------------------------------------------------------------------|------|--------------------------------------------------------------------------------------------------------------------------------------------------------------------------------------------------------------------------------------|----------------------------------------------------------------------|----|---|-----------|--------------------------------------|
|    | R.C., Sallum, E.A., Nociti Jr, F.H., Ambrosano, G.M., et al.                           |      | immunoinflammatory, and patient-centered performance in a split-mouth randomized clinical trial                                                                                                                                      |                                                                      |    |   |           |                                      |
| 56 | Kondreddy, K., Ambalavanan, N., Ramakrishna, T., & Kumar, R. S.                        | 2012 | Effectiveness of a controlled release chlorhexidine chip (PerioCol™-CG) as an adjunctive to scaling and root planing when compared to scaling and root planing alone in the treatment of chronic periodontitis: A comparative study. | Journal of Indian Society of Periodontology                          | 16 | 4 | 553-557   | No randomisation                     |
| 57 | Konuganti, K.; Kumar, A.                                                               | 2016 | Efficacy of subgingivally delivered flurbiprofen and chlorhexidine chip in the treatment of chronic periodontitis – A randomized controlled clinical trial                                                                           | International Journal of Pharmaceutical Sciences Review and Research | 40 | 1 | 149-153   | Adjunct not commercially available   |
| 58 | Koshy, G., Kawashima, Y., Kiji, M., Nitta, H., Umeda, M., Nagasawa, T., & Ishikawa, I. | 2005 | Effects of single-visit full-mouth ultrasonic debridement versus quadrant-wise ultrasonic debridement                                                                                                                                | Journal of Clinical Periodontology                                   | 32 | 7 | 734-743   | No passive control                   |
| 59 | Laleman, I., Pauwels, M., Quirynen, M., & Teughels, W.                                 | 2020 | A dual-strain Lactobacilli reuteri probiotic improves the treatment of residual pockets: A randomized controlled clinical trial.                                                                                                     | Journal of Clinical Periodontology                                   | 47 |   | 43-53     | Administered use of lozenges at home |
| 60 | Lauenstein, M., Kaufmann, M., & Persson, G. R.                                         | 2013 | Clinical and microbiological results following nonsurgical periodontal therapy with or                                                                                                                                               | Clinical Oral Investigations                                         | 17 | 7 | 1645-1660 | No CAL data                          |



|    |                                                                                                       |      |                                                                                                                                                                              |                                    |    |   |         |                           |
|----|-------------------------------------------------------------------------------------------------------|------|------------------------------------------------------------------------------------------------------------------------------------------------------------------------------|------------------------------------|----|---|---------|---------------------------|
|    |                                                                                                       |      | without local administration of piperacillin/tazobactam                                                                                                                      |                                    |    |   |         |                           |
| 61 | Leonhardt, Å., Bergström, C., Krok, L., & Cardaropoli, G.                                             | 2006 | Healing following ultrasonic debridement and PVP-iodine in individuals with severe chronic periodontal disease: a randomized, controlled clinical study.                     | Acta Odontologica Scandinavica     | 64 | 5 | 262-266 | PD in %                   |
| 62 | Leonhardt, Å., Bergström, C., Krok, L., & Cardaropoli, G.                                             | 2007 | Microbiological effect of the use of an ultrasonic device and iodine irrigation in patients with severe chronic periodontal disease: a randomized controlled clinical study. | Acta Odontologica Scandinavica     | 65 | 1 | 52-59   | No PPD/CAL data           |
| 63 | Lie, T., Bruun, G., & Böe, O. E.                                                                      | 1998 | Effects of topical metronidazole and tetracycline in treatment of adult periodontitis.                                                                                       | Journal of Periodontology          | 69 | 7 | 819-827 | Discontinued adjunct      |
| 64 | Machion, L., Andia, D. C., Lecio, G., Nociti Jr, F. H., Casati, M. Z., Sallum, A. W., & Sallum, E. A. | 2006 | Locally delivered doxycycline as an adjunctive therapy to scaling and root planing in the treatment of smokers: A 2-year follow-up                                           | Journal of Periodontology          | 77 | 4 | 606-613 | Extension of Machion 2004 |
| 65 | McColl, E., Patel, K., Dahlen, G., Tonetti, M., Graziani, F., Suvan, J., & Laurell, L.                | 2006 | Supportive periodontal therapy using mechanical instrumentation or 2% minocycline gel: a 12 month randomized, controlled, single masked pilot study.                         | Journal of Clinical Periodontology | 33 | 2 | 141-150 | Not used as adjunct       |
| 66 | Meinberg, T. A., Barnes, C. M., Dunning, D. G., & Reinhardt, R. A.                                    | 2002 | Comparison of conventional periodontal maintenance versus scaling and root planing with subgingival minocycline.                                                             | Journal of Periodontology          | 73 | 2 | 167-172 | No randomisation          |

|    |                                                                                                                                |      |                                                                                                                                                                                                         |                                                                                                       |                 |   |           |                                                                 |
|----|--------------------------------------------------------------------------------------------------------------------------------|------|---------------------------------------------------------------------------------------------------------------------------------------------------------------------------------------------------------|-------------------------------------------------------------------------------------------------------|-----------------|---|-----------|-----------------------------------------------------------------|
| 67 | Modanese, D. D. G., Tiosso-Tamburi, R., de Goes, V. F. F., de Cássia Bergamaschi, C., Martinez, E. F., Napimoga, M. H., et al. | 2016 | Clinical and immunoinflammatory evaluation of one-stage full-mouth ultrasonic debridement as a therapeutic approach for smokers with generalized aggressive periodontitis: A short-term follow-up study | Journal of Periodontology                                                                             | 87              | 9 | 1012-1021 | Not used as adjunct                                             |
| 68 | Mongardini, C., van Steenberghe, D., Dekeyser, C., & Quirynen, M.                                                              | 1999 | One stage full- versus partial-mouth disinfection in the treatment of chronic adult or generalized early-onset periodontitis. I. Long-term clinical observations.                                       | Journal of Periodontology                                                                             | 70              | 6 | 632-645   | Comparison of different SRP                                     |
| 69 | Müller, N., Moëne, R., Cancela, J. A., & Mombelli, A.                                                                          | 2014 | Subgingival air-polishing with erythritol during periodontal maintenance: randomized clinical trial of twelve months.                                                                                   | Journal of Clinical Periodontology                                                                    | 41              | 9 | 883-889   | CHX content not with the intention to have a therapeutic effect |
| 70 | Muzaheed, M., Acharya, S., Hakami, A.R., Allemailem, K.S., Alqahtani, K., Al Saffan, A., Aldakheel, F.M. and Divakar, D.D.     | 2020 | Effectiveness of single versus multiple sessions of photodynamic therapy as adjunct to scaling and root planing on periodontopathogenic bacteria in patients with periodontitis                         | Photodiagnosis and photodynamic therapy                                                               | 32              |   | 102035    | No passive control                                              |
| 71 | NCT02487186                                                                                                                    | 2015 | Locally delivered doxycycline adjunct to nonsurgical periodontal therapy                                                                                                                                | <a href="https://clinicaltrials.gov/show/nct02487186">https://clinicaltrials.gov/show/nct02487186</a> | Incomplete data |   |           |                                                                 |

|    |                                                                                                          |      |                                                                                                                                                                         |                                                                                                               |                 |   |         |                                      |
|----|----------------------------------------------------------------------------------------------------------|------|-------------------------------------------------------------------------------------------------------------------------------------------------------------------------|---------------------------------------------------------------------------------------------------------------|-----------------|---|---------|--------------------------------------|
| 72 | NCT04036890                                                                                              | 2019 | Local minocycline in patients under supportive periodontal therapy                                                                                                      | <a href="https://clinicaltrials.gov/ct2/show/nct04036890">https://clinicaltrials.gov/ct2/show/nct04036890</a> | Incomplete data |   |         |                                      |
| 73 | Newman, M. G., Kornman, K. S., & Doherty, F. M.                                                          | 1994 | A 6-month multi-center evaluation of adjunctive tetracycline fiber therapy used in conjunction with scaling and root planing in maintenance patients: Clinical results  | Journal of Periodontology                                                                                     | 65              | 7 | 685-691 | Discontinued adjunct                 |
| 74 | Okuda, K., Wolff, L., Oliver, R., Osbom, J., Stoltenberg, J., Bereuter, J., Anderson, L., et al.         | 1992 | Minocycline slow-release formulation effect on subgingival bacteria.                                                                                                    | Journal of Periodontology                                                                                     | 63              | 2 | 73-79   | No PPD/CAL data                      |
| 75 | Oringer, R. J., Van, T. D., & Lessem, J.                                                                 | 2002 | The challenge of treating periodontal patients who smoke - the efficacy of Arestin                                                                                      | Journal of The International Academy of Periodontology                                                        | 4               | 3 | 89-94   | Mix subpopulation of 2 RCTs          |
| 76 | Paquette, D., Oringer, R., Lessem, J., Offenbacher, S., Genco, R., Persson, G.R., Santucci, E.A., et al. | 2003 | Locally delivered minocycline microspheres for the treatment of periodontitis in smokers.                                                                               | Journal of Clinical Periodontology                                                                            | 30              | 9 | 787-794 | Subset of Williams 2001; no CAL data |
| 77 | Pedrazzoli, V., Kilian, M., & Karring, T.                                                                | 1992 | Comparative clinical and microbiological effects of topical subgingival application of metronidazole 25% dental gel and scaling in the treatment of adult periodontitis | Journal of Clinical Periodontology                                                                            | 19              | 9 | 715-722 | Not used as adjunct                  |

|    |                                                                                                                       |      |                                                                                                                                                                                  |                                    |    |   |         |                                         |
|----|-----------------------------------------------------------------------------------------------------------------------|------|----------------------------------------------------------------------------------------------------------------------------------------------------------------------------------|------------------------------------|----|---|---------|-----------------------------------------|
| 78 | Pejčić, A., Kojović, D.,<br>Minić, I., Mirković, D.,<br>Denić, M., & Stojanović, M.                                   | 2015 | Therapeutic efficacy of clindamycin gel as an adjunct to scaling and root planing therapy in chronic periodontal disease                                                         | Acta Clinica Croatica              | 54 | 1 | 46-50   | Adjunct not commercially available      |
| 79 | Pietruska, M., Paniczko, A.,<br>Waszkiel, D., Pietruski, J., &<br>Bernaczyk, A.                                       | 2006 | Efficacy of local treatment with chlorhexidine gluconate drugs on the clinical status of periodontium in chronic periodontitis patients                                          | Advances in Medical Sciences       | 51 | 7 | 162-165 | Adjunct administered one week after SRP |
| 80 | Quirynen, M., De Soete, M.,<br>Boschmans, G., Pauwels, M.,<br>Coucke, W., Teughels, W., &<br>Van Steenberghe, D.      | 2006 | Benefit of "one-stage full-mouth disinfection" is explained by disinfection and root planing within 24 hours: A randomized controlled trial                                      | Journal of Clinical Periodontology | 33 | 9 | 639-647 | Comparison of supragingival antiseptics |
| 81 | Quirynen, M., Mongardini, C.,<br>De Soete, M., Pauwels, M.,<br>Coucke, W., Van Eldere, J., &<br>Van Steenberghe, D.   | 2000 | The role of chlorhexidine in the one-stage full-mouth disinfection treatment of patients with advanced adult periodontitis. Long-term clinical and microbiological observations. | Journal of Clinical Periodontology | 27 | 8 | 578-589 | Comparison of different SRP             |
| 82 | Ratka-Krüger, P., Schacher, B.,<br>Bürklin, T., Böddinghaus, B.,<br>Holle, R., Renggli, H.H., Eickholz, P.,<br>et al. | 2005 | Non-surgical periodontal therapy with adjunctive topical doxycycline: a double-masked, randomized, controlled multicenter study. II. Microbiological results.                    | Journal of Periodontology          | 76 | 1 | 66-74   | No PPD/CAL data                         |

|    |                                                                                                                  |      |                                                                                                                                                           |                                             |    |     |         |                                                   |
|----|------------------------------------------------------------------------------------------------------------------|------|-----------------------------------------------------------------------------------------------------------------------------------------------------------|---------------------------------------------|----|-----|---------|---------------------------------------------------|
| 83 | Raut, C. P., Sethi, K. S., Kohale, B. R., Mamajiwala, A., & Warang, A.                                           | 2018 | Indocyanine green-mediated photothermal therapy in treatment of chronic periodontitis: A clinico-microbiological study.                                   | Journal of Indian Society of Periodontology | 22 | 3   | 221-227 | Adjunct not commercially available                |
| 84 | Renvert, S., Dahlén, G., & Snyder, B.                                                                            | 1997 | Clinical and microbiological effects of subgingival antimicrobial irrigation with citric acid as evaluated by an enzyme immunoassay and culture analysis. | Journal of Periodontology                   | 68 | 4   | 346-352 | No randomisation                                  |
| 85 | Renvert, S., Dahlen, G., & Wikström, M.                                                                          | 1996 | Treatment of periodontal disease based on microbiological diagnosis. Relation between microbiological and clinical parameters during 5 years              | Journal of Periodontology                   | 67 | 6   | 562-571 | Use of systemic antimicrobials                    |
| 86 | Ribeiro, É. D. P., Bittencourt, S., Sallum, E. A., Sallum, A. W., & Nociti Júnior, F. H.                         | 2010 | Non-surgical instrumentation associated with povidone-iodine in the treatment of interproximal furcation involvements                                     | Journal of Applied Oral Science             | 18 | 6   | 599-606 | Failing sites retreated per initial basic therapy |
| 87 | Rodrigues, I. F. G., Machion, L., Casati, M. Z., Nociti Jr, F. H., de Toledo, S., Sallum, A. W., & Sallum, E. A. | 2007 | Clinical evaluation of the use of locally delivered chlorhexidine in periodontal maintenance therapy                                                      | Journal of Periodontology                   | 78 | 4   | 624-628 | Adjunct administered 3 months after SRP           |
| 88 | Romano, F., Torta, I., Debernardi, C., & Aimetti, M.                                                             | 2005 | Debridement and local application of tetracycline in the management of persistent                                                                         | Minerva Stomatologica                       | 54 | 1-2 | 43-51   | Discontinued adjunct                              |

|    |                                                                                                                   |      |                                                                                                                                                                                                          |                                                        |    |    |           |                                                   |
|----|-------------------------------------------------------------------------------------------------------------------|------|----------------------------------------------------------------------------------------------------------------------------------------------------------------------------------------------------------|--------------------------------------------------------|----|----|-----------|---------------------------------------------------|
|    |                                                                                                                   |      | periodontitis. Clinical and microbiological results after 12 months.                                                                                                                                     |                                                        |    |    |           |                                                   |
| 89 | Rosling, B. G., Slots, J., Christersson, L. A., Gröndahl, H. G., & Genco, R. J.                                   | 1986 | Topical antimicrobial therapy and diagnosis of subgingival bacteria in the management of inflammatory periodontal disease                                                                                | Journal of Clinical Periodontology                     | 13 | 10 | 975-981   | Trial series                                      |
| 90 | Rosling, B., Hellström, M. K., Ramberg, P., Socransky, S. S., & Lindhe, J.                                        | 2001 | The use of PVP-iodine as an adjunct to non-surgical treatment of chronic periodontitis.                                                                                                                  | Journal of Clinical Periodontology                     | 28 | 11 | 1023-1031 | Failing sites retreated per initial basic therapy |
| 91 | Rudhart, A., Purucker, P., Kage, A., Hopfenmüller, W., & Bernimoulin, J. P.                                       | 1998 | Local metronidazole application in maintenance patients. Clinical and microbiological evaluation                                                                                                         | Journal of Periodontology                              | 69 | 10 | 1148-1154 | Not used as adjunct                               |
| 92 | Sakellari, D., Vouros, I., & Konstantinidis, A.                                                                   | 2003 | The use of tetracycline fibres in the treatment of generalised aggressive periodontitis: clinical and microbiological findings                                                                           | Journal of The International Academy of Periodontology | 5  | 2  | 52-60     | Discontinued adjunct                              |
| 93 | Santuchi, C. C., Cortelli, J. R., Cortelli, S. C., Cota, L. O. M., Fonseca, D. C., Alencar, C. O., & Costa, F. O. | 2016 | Scaling and root planing per quadrant versus one-stage full-mouth disinfection: assessment of the impact of chronic periodontitis treatment on quality of life - a clinical randomized, controlled trial | Journal of Periodontology                              | 87 | 2  | 114-123   | Comparison of different SRP                       |

|    |                                                                                                                               |      |                                                                                                                                                                                                                                               |                                    |    |    |           |                                             |
|----|-------------------------------------------------------------------------------------------------------------------------------|------|-----------------------------------------------------------------------------------------------------------------------------------------------------------------------------------------------------------------------------------------------|------------------------------------|----|----|-----------|---------------------------------------------|
| 94 | Santuchi, C. C., Cortelli, S. C., Cortelli, J. R., Cota, L. O. M., Alencar, C. O., & Costa, F. O.                             | 2015 | Pre- and post-treatment experiences of fear, anxiety, and pain among chronic periodontitis patients treated by scaling and root planing per quadrant versus one-stage full-mouth disinfection: A 6-month randomized controlled clinical trial | Journal of Clinical Periodontology | 42 | 11 | 1024-1031 | Comparison of different SRP                 |
| 95 | Schallhorn, R. A., cClain, P. K., Benhamou, V., Doobrow, J. H., Grandin, H. M., & Kasaj, A.                                   | 2020 | Application of enamel matrix derivative in conjunction with non-surgical therapy for treatment of moderate to severe periodontitis: A twelve-month, randomized prospective, multi-center study                                                | Journal of Periodontology          |    |    |           | Inclusion of medically compromised patients |
| 96 | Sculean, A., Windisch, P., Keglevich, T., & Gera, I.                                                                          | 2003 | Histologic evaluation of human intrabony defects following non-surgical periodontal therapy with and without application of an enamel matrix protein derivative.                                                                              | Journal of Periodontology          | 74 | 2  | 153-160   | Not RCT                                     |
| 97 | Segarra-Vidal, M., Guerra-Ojeda, S., Vallés, L.S., López-Roldán, A., Mauricio, M.D., Aldasoro, M., Alpiste-Illueca, F. et al. | 2017 | Effects of photodynamic therapy in periodontal treatment: A randomized, controlled clinical trial.                                                                                                                                            | Journal of Clinical Periodontology | 44 | 9  | 915-925   | Adjunct administered one week after SRP     |
| 98 | Shaddox, L. M., Andia, D. C., Casati, M. Z., Nociti, F. H., Sallum, E. A.,                                                    | 2007 | Microbiologic changes following administration of locally delivered doxycycline in smokers: a 15-month follow-up.                                                                                                                             | Journal of Periodontology          | 78 | 11 | 2143-2149 | Subset of Machion 2004, 2006                |

|     |                                                                                                        |      |                                                                                                                                                                                       |                                           |    |    |         |                                                               |
|-----|--------------------------------------------------------------------------------------------------------|------|---------------------------------------------------------------------------------------------------------------------------------------------------------------------------------------|-------------------------------------------|----|----|---------|---------------------------------------------------------------|
|     | Gollwitzer, J., & Walker, C. B.                                                                        |      |                                                                                                                                                                                       |                                           |    |    |         |                                                               |
| 99  | Shiloah, J., & Patters, M. R.                                                                          | 1996 | Repopulation of periodontal pockets by microbial pathogens in the absence of supportive therapy                                                                                       | Journal of Periodontology                 | 67 | 2  | 130-139 | CAL data not separated by groups                              |
| 100 | Singh, M., Shreehari, A. K., Garg, P. K., & Singh, S.                                                  | 2014 | Clinical efficacy of chlorhexidine chips and tetracycline fibers as an adjunct to non surgical periodontal therapy                                                                    | European Journal of General Dentistry     | 3  | 2  | 134-139 | Adjunct administered one week after SRP                       |
| 101 | Soeroso, Y., Akase, T., Sunarto, H., Kemal, Y., Salim, R., Octavia, M., Viandita, A., et al.           | 2017 | The risk reduction of recurrent periodontal pathogens of local application minocycline HCl 2% gel, used as an adjunct to scaling and root planing for chronic periodontitis treatment | Therapeutics and Clinical Risk Management | 13 |    | 307-314 | Duplicate of Soeroso 2016 which is more complete              |
| 102 | Soskolne, W. A., Heasman, P. A., Stabholz, A., Smart, G. J., Palmer, M., Flashner, M., & Newman, H. N. | 1997 | Sustained local delivery of chlorhexidine in the treatment of periodontitis: A multi-center study.                                                                                    | Journal of Periodontology                 | 68 | 1  | 32-38   | Failing sites of control not retreated, bias towards adjunct? |
| 103 | Soskolne, W. A., Proskin, H. M., & Stabholz, A.                                                        | 2003 | Probing depth changes following 2 years of periodontal maintenance therapy including adjunctive controlled release of chlorhexidine.                                                  | Journal of Periodontology                 | 74 | 4  | 420-427 | No randomisation                                              |
| 104 | Stelzel, M.                                                                                            | 1997 | Topical metronidazole application in recall patients: Long-term results                                                                                                               | Journal of Clinical Periodontology        | 24 | 12 | 914-919 | Not used as adjunct                                           |



|     |                                                                                                                         |      |                                                                                                                                                                                         |                                                     |    |   |           |                                                               |
|-----|-------------------------------------------------------------------------------------------------------------------------|------|-----------------------------------------------------------------------------------------------------------------------------------------------------------------------------------------|-----------------------------------------------------|----|---|-----------|---------------------------------------------------------------|
| 105 | Sweatha, C., Srikanth, C., & Babu, M. R.                                                                                | 2015 | A comparative study of the effect of minocycline microspheres as an adjunct to scaling and root planing versus scaling and root planing alone in the treatment of chronic periodontitis | International Journal of Recent Scientific Research | 6  | 4 | 3540-3550 | Failing sites of control not retreated, bias towards adjunct? |
| 106 | Swierkot, K., Nonnenmacher, C. I., Mutters, R., Flores-de-Jacoby, L., & Mengel, R.                                      | 2009 | One-stage full-mouth disinfection versus quadrant and full-mouth root planing                                                                                                           | Journal of Clinical Periodontology                  | 36 | 3 | 240-249   | Comparison of different SRP                                   |
| 107 | Timmerman, M. F., Van der Weijden, G. A., Van Steenberghe, T. J. M., Mantel, M. S., De Graaff, J., & Van der Velden, U. | 1996 | Evaluation of the long-term efficacy and safety of locally-applied minocycline in adult periodontitis patients                                                                          | Journal of Clinical Periodontology                  | 23 | 8 | 707-716   | Subset of van Steenberghe 1999                                |
| 108 | Trojahn, M. R. B., Silva, R. C. D., & Joly, J. C.                                                                       | 2013 | Non-surgical periodontal therapy for the treatment of chronic periodontitis                                                                                                             | Rgo. Revista Gaúcha De Odontologia (Online)         | 61 | 4 | 529-534   | Adjunct not commercially available                            |
| 109 | Tomasi, C., & Wennström, J. L.                                                                                          | 2011 | Locally delivered doxycycline as an adjunct to mechanical debridement at retreatment of periodontal pockets: outcome at furcation sites                                                 | Journal of Periodontology                           | 82 | 2 | 210-218   | Subset of Tomasi 2008                                         |
| 110 | Tonetti, M. S., Cortellini, P., Carnevale, G., Cattabriga,                                                              | 1998 | A controlled multicenter study of adjunctive use of tetracycline periodontal fibers in                                                                                                  | Journal of Clinical Periodontology                  | 25 | 9 | 728-736   | Discontinued adjunct                                          |

|     |                                                                                                           |      |                                                                                                                                                                                                                   |                                    |    |   |         |                                                   |
|-----|-----------------------------------------------------------------------------------------------------------|------|-------------------------------------------------------------------------------------------------------------------------------------------------------------------------------------------------------------------|------------------------------------|----|---|---------|---------------------------------------------------|
|     | M., De Sanctis, M., & Prato, G. P.                                                                        |      | mandibular class II furcations with persistent bleeding                                                                                                                                                           |                                    |    |   |         |                                                   |
| 111 | Tonetti, M.S., Lang, N.P., Cortellini, P., Suvan, J.E., Eickholz, P., Fourmoussis, I., Topoll, H., et al. | 2012 | Effects of a single topical doxycycline administration adjunctive to mechanical debridement in patients with persistent/recurrent periodontitis but acceptable oral hygiene during supportive periodontal therapy | Journal of Clinical Periodontology | 39 | 5 | 475-482 | Failing sites retreated per initial basic therapy |
| 112 | Ueda, M., Teranishi, Y., Nakagaki, N., Imai, H., Katagiri, E. & Funaoka, K.                               | 1995 | Periodontal therapy by local delivery of antibiotics - Periocline (R) administration in periodontal pocket in combination with scaling - (Part 4).                                                                | Oral Therapeutics and Pharmacology | 14 | 2 | 99-105  | Duration less than 6 months                       |
| 113 | Ueda, M., Ogata, C., Suga, H., Kohno, T., Imai, H., Cao, C., Geng, S., et al.                             | 2001 | Periodontal therapy with local delivery of antibiotics: Part 1 Observation at Osaka Dental University                                                                                                             | Shikaigaku                         | 64 | 2 | 187-190 | Duration less than 6 months                       |
| 114 | Ueda, M., Ogata, C., Suga, H., Kohno, T., Imai, H., Cao, C., Geng, S., et al.                             | 2001 | Periodontal therapy with local delivery of antibiotics: Part 2 Observation at Beijing University                                                                                                                  | Shikaigaku                         | 64 | 2 | 191-194 | Duration less than 6 months                       |
| 115 | Unsal, E., Akkaya, M., & Walsh, T. F.                                                                     | 1994 | Influence of a single application of subgingival chlorhexidine gel or tetracycline paste on the clinical parameters of adult periodontitis patients.                                                              | Journal of Clinical Periodontology | 21 | 5 | 351-355 | Duration less than 6 months                       |

|     |                                                                                |      |                                                                                                                                                              |                                                             |    |    |           |                                          |
|-----|--------------------------------------------------------------------------------|------|--------------------------------------------------------------------------------------------------------------------------------------------------------------|-------------------------------------------------------------|----|----|-----------|------------------------------------------|
| 116 | Vandekerckhove, B. N., Bollen, C. M., Dekeyser, C., Darius, P., & Quirynen, M. | 1996 | Full- versus partial-mouth disinfection in the treatment of periodontal infections. Long-term clinical observations of a pilot study                         | Journal of Periodontology                                   | 67 | 12 | 1251-1259 | Comparison of different SRP              |
| 117 | Vandekerckhove, B. N., Quirynen, M., & van Steenberghe, D.                     | 1997 | The use of tetracycline-containing controlled-release fibers in the treatment of refractory periodontitis.                                                   | Journal of Periodontology                                   | 68 | 4  | 353-361   | Discontinued adjunct                     |
| 118 | Vitt, A., Gustafsson, A., Ramberg, P., Slizen, V., Kazeko, L. A., & Buhlin, K. | 2019 | Polyhexamethylene guanidine phosphate irrigation as an adjunctive to scaling and root planing in the treatment of chronic periodontitis.                     | Acta Odontologica Scandinavica                              | 77 | 4  | 290-295   | No CAL data                              |
| 119 | Wennström, J. L., Heijl, L., Dahlén, G., & Gröndahl, K.                        | 1987 | Periodic subgingival antimicrobial irrigation of periodontal pockets (I). Clinical observations.                                                             | Journal of Clinical Periodontology                          | 14 | 9  | 541-550   | Adjunct placed before SRP                |
| 120 | Wong, M. Y., Lu, C. L., Liu, C. M., & Hou, L. T.                               | 1999 | Microbiological response of localized sites with recurrent periodontitis in maintenance patients treated with tetracycline fibers.                           | Journal of Periodontology                                   | 70 | 8  | 861-868   | Discontinued adjunct                     |
| 121 | Wong, M. Y., Lu, C. L., Liu, C. M., Hou, L. T., & Chang, W. K.                 | 1998 | Clinical response of localized recurrent periodontitis treated with scaling, root planing, and tetracycline fiber.                                           | Journal of The Formosan Medical Association = Taiwan Yi Zhi | 97 | 7  | 490-497   | Discontinued adjunct                     |
| 122 | Zingale, J., Harpenau, L., Bruce, G., Chambers, D., & Lundergan, W.            | 2012 | The effectiveness of scaling and root planing with adjunctive time-release minocycline using an open and closed approach for the treatment of periodontitis. | General Dentistry                                           | 60 | 4  | 300-305   | No CAL data, compared surgical procedure |

|                                  |                                                                          |      |                                                                                                                                                                        |                                          |    |   |         |                             |
|----------------------------------|--------------------------------------------------------------------------|------|------------------------------------------------------------------------------------------------------------------------------------------------------------------------|------------------------------------------|----|---|---------|-----------------------------|
| 123                              | Kumar, V., Singhal, R., Rastogi, P., Lal, N., Pandey, S., & Mahdi, A. A. | 2021 | Localized probiotic-guided pocket recolonization in the treatment of chronic periodontitis: a randomized controlled clinical trial                                     | Journal of Periodontal & Implant Science | 51 | 3 | 199     | Duration less than 6 months |
| <b>Single application of LDA</b> |                                                                          |      |                                                                                                                                                                        |                                          |    |   |         |                             |
| 123                              | Aboelsaad, N., Ghandour, R. & Abiad, R.                                  | 2014 | Clinical efficacy of local delivered minocycline in the treatment of chronic periodontitis smoker patients.                                                            | Journal of Dentistry & Oral Health       | 1  |   | 1-5     |                             |
| 124                              | Ağan, S., Sönmez, S. & Serdar, M.                                        | 2006 | The effect of topical doxycycline usage on gingival crevicular fluid MMP-8 levels of chronic and aggressive periodontitis patients: A pilot study                      | International Journal of Dental Hygiene  | 4  | 3 | 114-121 |                             |
| 125                              | Alwaeli, H. A., Al-Khateeb, S. N. & Al-Sadi, A.                          | 2015 | Long-term clinical effect of adjunctive antimicrobial photodynamic therapy in periodontal treatment: A randomized clinical trial                                       | Lasers in Medical Science                | 30 | 2 | 801-807 |                             |
| 126                              | Azmak, N., Atilla, G., Luoto, H. & Sorsa, T.                             | 2002 | The effect of subgingival controlled-release delivery of chlorhexidine chip on clinical parameters and matrix metalloproteinase-8 levels in gingival crevicular fluid. | Journal of Periodontology                | 73 | 6 | 608-615 |                             |
| 127                              | Berakdar, M., Callaway, A., Fakhr Eddin, M., Roß, A. & Willershausen, B. | 2012 | Comparison between scaling-root-planing (SRP) and SRP/photodynamic therapy: Six-month study                                                                            | Head and Face Medicine                   | 8  | 1 | 2-7     |                             |

|     |                                                                                                               |      |                                                                                                                                                       |                                                        |    |   |           |                       |
|-----|---------------------------------------------------------------------------------------------------------------|------|-------------------------------------------------------------------------------------------------------------------------------------------------------|--------------------------------------------------------|----|---|-----------|-----------------------|
| 128 | Betsy, J., Prasanth, C. S., Baiju, K. V., Presanthila, J. & Subhash, N.                                       | 2014 | Efficacy of antimicrobial photodynamic therapy in the management of chronic periodontitis: A randomized controlled clinical trial                     | Journal of Clinical Periodontology                     | 41 |   | 573–581   |                       |
| 129 | Betsy, J., Prasanth, C. S., Baiju, K. V., Presanthila, J. & Subhash, N.                                       | 2016 | Patients' perceptions of antimicrobial photodynamic therapy in the management of chronic periodontitis                                                | Photodiagnosis Photodynamic Therapy                    | 14 |   | 84-90     | Related to Betsy 2014 |
| 130 | Buduneli, E., Tünger, A., Evrenosoglu, E. & Bilgiç, A.                                                        | 2001 | Comparative clinical and microbiological effects of subgingival metronidazole application in adult periodontitis; 12-months results.                  | Journal of the International Academy of Periodontology | 3  | 4 | 81-86     |                       |
| 131 | Chondros, P., Nikolidakis, D., Christodoulides, N., Rössler, R., Gutknecht, N. & Sculean, A.                  | 2009 | Photodynamic therapy as adjunct to non-surgical periodontal treatment in patients on periodontal maintenance: A randomized controlled clinical trial. | Lasers in Medical Science                              | 24 | 5 | 681–688   |                       |
| 132 | Christodoulides, N., Nikolidakis, D., Chondros, P., Becker, J., Schwarz, F., Rössler, R., Sculean, A., et al. | 2008 | Photodynamic therapy as an adjunct to non-surgical periodontal treatment: A randomized, controlled clinical trial.                                    | Journal of Periodontology                              | 79 | 9 | 1638–1644 |                       |
| 133 | Cosyn, J., Wyn, I., De Rouck, T. & Sabzevar, M. M.                                                            | 2006 | Long-term clinical effects of a chlorhexidine varnish implemented treatment strategy for chronic periodontitis                                        | Journal of Periodontology                              | 77 | 3 | 406–415   |                       |

|     |                                                                                                                            |      |                                                                                                                                                                           |                                                    |    |   |         |  |
|-----|----------------------------------------------------------------------------------------------------------------------------|------|---------------------------------------------------------------------------------------------------------------------------------------------------------------------------|----------------------------------------------------|----|---|---------|--|
| 134 | Denez, E. M., Toma, S., Lasserre, J. F. & Brex, M. C.                                                                      | 2016 | Evaluation of a unique subgingival irrigation with 10% povidone-iodine after scaling and root planing: A randomized clinical trial.                                       | Quintessence international (Berlin, Germany: 1985) | 47 | 7 | 549–558 |  |
| 135 | Deo, V., Ansari, S., Mandia, S. & Bhongade, M.                                                                             | 2011 | Therapeutic efficacy of subgingivally delivered doxycycline hyclate as an adjunct to non-surgical treatment of chronic periodontitis.                                     | Journal of Oral and Maxillofacial Research         | 2  | 1 | E3      |  |
| 136 | Derikvand, N., Ghasemi, S. S., Safiaghdam, H., Piriaei, H., & Chiniforush, N.                                              | 2020 | Antimicrobial Photodynamic Therapy with Diode laser and Methylene blue as an adjunct to scaling and root planning: A clinical trial.                                      | Photodiagnosis and photodynamic therapy            | 31 |   | 101818  |  |
| 137 | Dilsiz, A., Canakci, V. & Aydin, T.                                                                                        | 2013 | Clinical effects of potassium–titanyl–phosphate laser and photodynamic therapy on outcomes of treatment of chronic periodontitis: A randomized controlled clinical trial. | Journal of Periodontology                          | 84 | 3 | 278–286 |  |
| 138 | do Vale, H. F., Casarin, R. C. V., Taiete, T., Bovi Ambrosano, G. M., Ruiz, K. G. S., Nociti, F. H., Sallum, E. A., et al. | 2016 | Full-mouth ultrasonic debridement associated with povidone iodine rinsing in GAgP treatment: a randomised clinical trial.                                                 | Clinical Oral Investigations                       | 20 | 1 | 141–150 |  |
| 139 | Eick, S., Renatus, A., Heinicke, M., Pfister, W., Stratul, S.-I. & Jentsch, H.                                             | 2013 | Hyaluronic acid as an adjunct after scaling and root planing: A prospective randomized clinical trial.                                                                    | Journal of Periodontology                          | 84 | 7 | 941–949 |  |
| 140 | Gandhi, K., Pavaskar, R., Cappetta, E. & Drew, H.                                                                          | 2019 | Effectiveness of adjunctive use of low-level laser therapy and photodynamic therapy after                                                                                 | The International Journal of                       | 39 | 6 | 837–843 |  |

|     |                                                                                                        |      |                                                                                                                                                                                      |                                                        |    |    |         |  |
|-----|--------------------------------------------------------------------------------------------------------|------|--------------------------------------------------------------------------------------------------------------------------------------------------------------------------------------|--------------------------------------------------------|----|----|---------|--|
|     |                                                                                                        |      | scaling and root planing in patients with chronic periodontitis.                                                                                                                     | Periodontics & Restorative Dentistry                   |    |    |         |  |
| 141 | Griffiths, G. S., Smart, G. J., Bulman, J. S., Weiss, G., Shrowder, J. & Newman, H. N.                 | 2000 | Comparison of clinical outcomes following treatment of chronic adult periodontitis with subgingival scaling or subgingival scaling plus metronidazole gel.                           | Journal of Clinical Periodontology                     | 27 | 12 | 910–917 |  |
| 142 | Heasman, P. A., Heasman, L., Stacey, F. & McCracken, G. I.                                             | 2001 | Local delivery of chlorhexidine gluconate (PerioChip) in periodontal maintenance patients.                                                                                           | Journal of Clinical Periodontology                     | 28 | 1  | 90–95   |  |
| 143 | Henderson, R. J., Boyens, J. V., Holborow, D. W. & Pack, A. R. C.                                      | 2002 | Scaling and root-planing treatment with adjunctive subgingival minocycline. A clinical pilot study over six months, of sites adjacent to and remote from the antibiotic application. | Journal of the International Academy of Periodontology | 4  | 3  | 77–87   |  |
| 144 | Hill, G., Dehn, C., Hinze, A. V., Frentzen, M. & Meister, J.                                           | 2019 | Indocyanine green-based adjunctive antimicrobial photodynamic therapy for treating chronic periodontitis: A randomized clinical trial.                                               | Photodiagnosis and Photodynamic Therapy                | 26 |    | 29–35   |  |
| 145 | Isola, G., Matarese, G., Williams, R. C., Siciliano, V. I., Alibrandi, A., Cordasco, G. & Ramaglia, L. | 2018 | The effects of a desiccant agent in the treatment of chronic periodontitis: a randomized, controlled clinical trial.                                                                 | Clinical Oral Investigations                           | 22 | 2  | 791–800 |  |

|     |                                                                                                                     |      |                                                                                                                                                                                            |                                             |    |   |           |  |
|-----|---------------------------------------------------------------------------------------------------------------------|------|--------------------------------------------------------------------------------------------------------------------------------------------------------------------------------------------|---------------------------------------------|----|---|-----------|--|
| 146 | Jain, M., Dave, D., Jain, P., Manohar, B., Yadav, B. & Shetty, N.                                                   | 2013 | Efficacy of xanthan based chlorhexidine gel as an adjunct to scaling and root planing in treatment of the chronic periodontitis.                                                           | Journal of Indian Society of Periodontology | 17 | 4 | 439–43    |  |
| 147 | Jain, R., Mohamed, F. & Hemalatha, M.                                                                               | 2012 | Minocycline containing local drug delivery system in the management of chronic periodontitis: A randomized controlled trial.                                                               | Journal of Indian Society of Periodontology | 16 | 2 | 179–83.   |  |
| 148 | Kranti, K., Seshan, H. & Sameer, Z.                                                                                 | 2010 | Clinical evaluation of topical subgingival application of biodegradable xanthan based 1.5% Chlorhexidine gel for treatment of periodontal pockets.                                         | Journal of Advanced Oral Research           | 1  | 1 | 47–54     |  |
| 149 | Krück, C., Eick, S., Knöfler, G. U., Purschwitz, R. E. & Jentsch, H. F. R.                                          | 2012 | Clinical and microbiologic results 12 months after scaling and root planing with different irrigation solutions in patients with moderate chronic periodontitis: A pilot randomized trial. | Journal of Periodontology                   | 83 | 3 | 312–320   |  |
| 150 | Leiknes, T., Leknes, K. N., Bøe, O. E., Skavland, R. J. & Lie, T.                                                   | 2007 | Topical use of a metronidazole gel in the treatment of sites with symptoms of recurring chronic inflammation.                                                                              | Journal of Periodontology                   | 78 | 8 | 1538–1544 |  |
| 151 | Luchesi, V. H., Pimentel, S. P., Kolbe, M. F., Ribeiro, F. V., Casarin, R. C., Nociti, F. H., Sallum, E. A., et al. | 2013 | Photodynamic therapy in the treatment of class II furcation: a randomized controlled clinical trial.                                                                                       | Journal of Clinical Periodontology          | 40 | 8 | 781–788   |  |
| 152 | Machion, L., Andia, D. C., Benatti, B. B., Carvalho, M.                                                             | 2004 | Locally delivered doxycycline as an                                                                                                                                                        | Journal of Periodontology                   | 75 | 3 | 464–469   |  |



|     |                                                                                                                 |      |                                                                                                                                                                                        |                                                         |    |   |           |  |
|-----|-----------------------------------------------------------------------------------------------------------------|------|----------------------------------------------------------------------------------------------------------------------------------------------------------------------------------------|---------------------------------------------------------|----|---|-----------|--|
|     | D., Nogueira-Filho, G. R., Casati, M. Z., Nociti, F. H., et al.                                                 |      | adjunctive therapy to scaling and root planing in the treatment of smokers: A clinical study.                                                                                          |                                                         |    |   |           |  |
| 153 | Malgikar, S., Reddy, Sh., Sagar, Sv., Satyanarayana, D., Reddy, Gv. & Josephin, Jj.                             | 2016 | Clinical effects of photodynamic and low-level laser therapies as an adjunct to scaling and root planing of chronic periodontitis: A split-mouth randomized controlled clinical trial. | Indian Journal of Dental Research                       | 27 | 2 | 121–126   |  |
| 154 | Matesanz, P., Herrera, D., Echeverría, A., O'Connor, A., González, I., Sanz, M., O'Connor, A., et al.           | 2013 | A randomized clinical trial on the clinical and microbiological efficacy of a xanthan gel with chlorhexidine for subgingival use.                                                      | Clinical Oral Investigations                            | 17 | 1 | 55–66     |  |
| 155 | Paolantonio, M., D'Angelo, M., Grassi, R. F., Perinetti, G., Piccolomini, R., Pizzo, G., Annunziata, M., et al. | 2008 | Clinical and microbiologic effects of subgingival controlled-release delivery of chlorhexidine chip in the treatment of periodontitis: A multicenter study.                            | Journal of Periodontology                               | 79 | 2 | 271–282   |  |
| 156 | Paolantonio, M., D'Ercole, S., Pilloni, A., D'Archivio, D., Lisanti, L., Graziani, F., Femminella, B., et al.   | 2009 | Clinical, microbiologic, and biochemical effects of subgingival administration of a xanthan-based chlorhexidine gel in the treatment of periodontitis: A randomized multicenter trial. | Journal of Periodontology                               | 80 | 9 | 1479–1492 |  |
| 157 | Paolantonio, M., Dolci, M., Perfetti, G., Sammartino, G., D'Archivio, D., Spoto, G., Ciampoli, C., et al.       | 2008 | Effect of a subgingival chlorhexidine chip on the clinical parameters and the levels of alkaline phosphatase activity in gingival                                                      | Journal of Biological Regulators and Homeostatic Agents | 22 | 1 | 63–72     |  |

|     |                                                                                      |      |                                                                                                                                                                              |                                                        |    |   |             |  |
|-----|--------------------------------------------------------------------------------------|------|------------------------------------------------------------------------------------------------------------------------------------------------------------------------------|--------------------------------------------------------|----|---|-------------|--|
|     |                                                                                      |      | crevicular fluid during the non-surgical treatment of periodontitis.                                                                                                         |                                                        |    |   |             |  |
| 158 | Reddy, S., Reddy, S. & Bhowmick, N.                                                  | 2016 | A comparison of chlorhexidine and tetracycline local drug delivery systems in management of persistent periodontal pockets - A clinical study.                               | International Journal of Applied Dental Sciences       | 2  | 3 | 11-15       |  |
| 159 | Sakellari, D., Ioannidis, I., Antoniadou, M., Slini, T. & Konstantinidis, A.         | 2010 | Clinical and microbiological effects of adjunctive, locally delivered chlorhexidine on patients with chronic periodontitis.                                                  | Journal of the International Academy of Periodontology | 12 | 1 | 20-26       |  |
| 160 | Schär, D., Ramseier, C. A., Eick, S., Mettraux, G., Salvi, G. E., & Sculean, A.      | 2020 | Transgingival photodynamic therapy (tg-aPDT) adjunctive to subgingival mechanical instrumentation in supportive periodontal therapy. A randomized controlled clinical study. | Photodiagnosis and Photodynamic Therapy                | 32 |   | 10197<br>1  |  |
| 161 | Soeroso, Y., Soenarto, H., Bachtiar, B. M., Kemal, Y., Masulili, S. L. & Lessang, R. | 2016 | Efficacy of local minocycline HCl 2% gel as adjuvant for scaling and root planing in chronic periodontitis : A prospective randomized open blinded endpoint study            | Current Issues in Periodontics                         |    |   | 69-77       |  |
| 162 | Stelzel, M. & Florès-de-Jacoby, L.                                                   | 2000 | Topical metronidazole application as an adjunct to scaling and root planing.                                                                                                 | Journal of Clinical Periodontology                     | 27 | 6 | 447-<br>452 |  |

|     |                                                                                                                            |      |                                                                                                                                                                   |                                                                    |    |    |           |  |
|-----|----------------------------------------------------------------------------------------------------------------------------|------|-------------------------------------------------------------------------------------------------------------------------------------------------------------------|--------------------------------------------------------------------|----|----|-----------|--|
| 163 | Tabenski, L., Moder, D., Cieplik, F., Schenke, F., Hiller, K. A., Buchalla, W, Schmalz, G. et al.                          | 2017 | Antimicrobial photodynamic therapy vs. local minocycline in addition to non-surgical therapy of deep periodontal pockets: A controlled randomized clinical trial. | Clinical Oral Investigations                                       | 21 | 7  | 2253-2264 |  |
| 164 | Theodoro, L. H., Silva, S. P., Pires, J. R., Soares, G. H. G., Pontes, A. E. F., Zuza, E. P., Spolidório, D. M. P., et al. | 2010 | Clinical and microbiological effects of photodynamic therapy associated with nonsurgical periodontal treatment. A 6-month follow-up.                              | Lasers in Medical Science                                          | 27 | 4  | 687–693   |  |
| 165 | Tomasi, C., Koutouzis, T. & Wennström, J. L.                                                                               | 2008 | Locally delivered doxycycline as an adjunct to mechanical debridement at retreatment of periodontal pockets.                                                      | Journal of Periodontology                                          | 79 | 3  | 431–439   |  |
| 166 | Van Dyke, T. E., Offenbacher, S., Braswell, L. & Lessem, J.                                                                | 2002 | Enhancing the value of scaling and root-planing: Arestin clinical trial results.                                                                                  | Journal of the International Academy of Periodontology             | 4  | 3  | 72–76     |  |
| 167 | Williams, R. C., Paquette, D. W., Offenbacher, S., Adams, D. F., Armitage, G. C., Bray, K., Caton, J., et al.              | 2001 | Treatment of periodontitis by local administration of minocycline microspheres: A controlled trial.                                                               | Journal of Periodontology                                          | 72 | 11 | 1535–1544 |  |
| 168 | Zhao, N.; Ge, S.H.; Ding, G.Y.                                                                                             | 2006 | Clinical effect of minocycline as adjunctive therapy to scaling and root planning on treatment of chronic periodontitis.                                          | Hua Xi Kou Qiang Yi Xue Za Zhi [West China Journal of Stomatology] | 24 | 1  | 32-35     |  |

|     |                                                                                    |      |                                  |                                                                                                                                                                               |  |
|-----|------------------------------------------------------------------------------------|------|----------------------------------|-------------------------------------------------------------------------------------------------------------------------------------------------------------------------------|--|
| 170 | FDA Center for Drug<br>Application Reviews<br>Statistical Review and<br>Evaluation | 2001 | Application Number NDA<br>50-781 | <a href="https://www.accessdata.fda.gov/drugsatfda_docs/nda/2001/50781_Arestin_statr.pdf">https://www.accessdata.fda.gov/drugsatfda_docs/nda/2001/50781_Arestin_statr.pdf</a> |  |
|-----|------------------------------------------------------------------------------------|------|----------------------------------|-------------------------------------------------------------------------------------------------------------------------------------------------------------------------------|--|

**Table S2. Judgment of each risk of bias item for each included study according ROB2**

| Domain                 | Randomisation process |                                                                                              | Deviations from intended interventions |                                                                              | Missing outcome data |                      | Measurement of the outcome |                                                | Selection of the reported result |                                                  | Overall Bias  |
|------------------------|-----------------------|----------------------------------------------------------------------------------------------|----------------------------------------|------------------------------------------------------------------------------|----------------------|----------------------|----------------------------|------------------------------------------------|----------------------------------|--------------------------------------------------|---------------|
| Study                  | Authors' Judgment     | Support for Judgment                                                                         | Authors' Judgment                      | Support for Judgment                                                         | Authors' Judgment    | Support for Judgment | Authors' Judgment          | Support for Judgment                           | Authors' Judgment                | Support for Judgment                             |               |
| (Bogren et al. 2008)   | Some concerns         | Computer-generated permuted block; No information on concealment; no imbalances are apparent | Some concerns                          | Blinding of participant, clinician not reported; intention-to-treat analysis | Low                  | 4/128 lost, ITT      | Some concerns              | Appropriate, blinding of examiner not reported | Low                              | Evidence of selective reporting was not detected | Some concerns |
| (Carvalho et al. 2007) | Some concerns         | Coin toss; No information on concealment; no imbalances                                      | Some concerns                          | Triple blinded; per protocol analysis                                        | Low                  | 2/28 lost (7.14%)    | Low                        | Appropriate, blinded examiner                  | Low                              | Evidence of selective reporting was not          | Some concerns |

|                          |               |                                                                                          |               |                                        |      |                    |     |                               |               |                                                              |               |
|--------------------------|---------------|------------------------------------------------------------------------------------------|---------------|----------------------------------------|------|--------------------|-----|-------------------------------|---------------|--------------------------------------------------------------|---------------|
| (Grisi et al. 2002)      | Some concerns | are apparent<br>No information on randomisation, concealment; no imbalances are apparent | High          | Single blinded; per protocol analysis  | Low  | 1/20 lost (5%)     | Low | Appropriate, blinded examiner | Low           | detected<br>Evidence of selective reporting was not detected | High          |
| (Harmouch e et al. 2019) | Low           | Computer-generated randomly permuted block; opaque envelopes; no imbalances are apparent | Some concerns | Sham used; per protocol analysis       | High | 8/36 lost (22.22%) | Low | Appropriate, blinded examiner | Low           | Evidence of selective reporting was not detected             | High          |
| (Kasaj et al. 2007)      | Some concerns | No information on randomisation, concealment; no imbalances are apparent                 | High          | Single blinded; per protocol analysis  | Low  | 0/20 lost          | Low | Appropriate, blinded examiner | Some concerns | Adverse event not reported                                   | High          |
| (Katsikanis et al. 2020) | Some concerns | randomisation chart; No information on                                                   | Some concerns | Blinding of participant, clinician not | Low  | 0/21 lost          | Low | Appropriate, blinded examiner | Low           | Evidence of selective reporting                              | Some concerns |

|                          |                  |                                                                                                                        |                  |                                                                                         |                  |                      |                  |                                             |                  |                                                              |                  |
|--------------------------|------------------|------------------------------------------------------------------------------------------------------------------------|------------------|-----------------------------------------------------------------------------------------|------------------|----------------------|------------------|---------------------------------------------|------------------|--------------------------------------------------------------|------------------|
|                          |                  | concealment;<br>no imbalances<br>are apparent                                                                          |                  | reported; per<br>protocol<br>analysis                                                   |                  |                      |                  |                                             |                  | was not<br>detected                                          |                  |
| (Killeen et<br>al. 2018) | Some<br>concerns | Coin toss; No<br>information on<br>concealment;<br>no imbalances<br>are apparent                                       | Some<br>concerns | Blinding of<br>participants,<br>clinician not<br>specified; per<br>protocol<br>analysis | Some<br>concerns | 7/55 lost<br>(12.7%) | Low              | Appropriate,<br>blinded<br>examiner         | Low              | Evidence of<br>selective<br>reporting<br>was not<br>detected | Some<br>concerns |
| (Lulic et al.<br>2009)   | Some<br>concerns | randomisation<br>table; No<br>information on<br>concealment;                                                           | Low              | Sham used;<br>per protocol<br>analysis                                                  | Low              | 0/10 lost            | Low              | Appropriate,<br>blinded<br>examiner         | Some<br>concerns | Adverse<br>event not<br>reported                             | Some<br>concerns |
| (Megally et<br>al. 2020) | Some<br>concerns | Computer-<br>generated<br>randomisation<br>list; No<br>information on<br>concealment;<br>no imbalances<br>are apparent | Some<br>concerns | Blinding of<br>participant,<br>clinician not<br>reported; per<br>protocol<br>analysis   | Low              | 0/32 lost            | Low              | Appropriate,<br>blinded<br>examiner         | Low              | Evidence of<br>selective<br>reporting<br>was not<br>detected | Some<br>concerns |
| (Mizrak et<br>al. 2006)  | Some<br>concerns | Coin toss; No<br>information on<br>concealment;                                                                        | High             | Single<br>blinded; per<br>protocol                                                      | Low              | 0/34 lost            | Some<br>concerns | Appropriate,<br>blinding of<br>examiner not | Some<br>concerns | Adverse<br>event not<br>reported                             | High             |

|                                |               |                                                                          |               |                                                                        |     |                  |               |                                                |               |                                       |               |
|--------------------------------|---------------|--------------------------------------------------------------------------|---------------|------------------------------------------------------------------------|-----|------------------|---------------|------------------------------------------------|---------------|---------------------------------------|---------------|
|                                |               | no imbalances are apparent                                               |               | analysis                                                               |     |                  |               | reported                                       |               |                                       |               |
| (Müller Campanile et al. 2015) | Low           | Computer-generated table; serially numbered sealed envelopes; no         | Some concerns | Sham used; per protocol analysis                                       | Low | 1/28 lost (3.6%) | Low           | Appropriate, blinded examiner                  | Low           | Evidence of selective reporting       | Some concerns |
| (Petelin et al. 2015)          | Some concerns | No information on randomisation, concealment; no imbalances are apparent | Some concerns | Blinding of participant, clinician not reported; per protocol analysis | Low | 0/27 lost        | Some concerns | Appropriate, blinding of examiner not reported | Some concerns | Adverse event not reported            | Some concerns |
| (Shalev 2019)                  | Some concerns | No information on randomisation, concealment; no imbalances are apparent | Low           | Sham and placebo used; intention-to-treat analysis                     | Low | 1/59 lost, TTL   | Low           | Appropriate, blinded examiner                  | Some concerns | Adverse event not reported            | Some concerns |
| (Sukumar et al. 2020)          | Some concerns | Randomisation using sealed and opaque envelopes                          | High          | Single blinded; per protocol analysis                                  | Low | 3/33 lost (9.1%) | Low           | Appropriate, blinded examiner                  | Some concerns | Nonparametric data but report in mean | High          |

|                              |               |                                                                                                   |               |                                       |               |                     |               |                                                |               |                                                  |               |
|------------------------------|---------------|---------------------------------------------------------------------------------------------------|---------------|---------------------------------------|---------------|---------------------|---------------|------------------------------------------------|---------------|--------------------------------------------------|---------------|
| (van Steenbergh et al. 1999) | Some concerns | Computer-generated randomisation code; No information on concealment; no imbalances are apparent  | Some concerns | Placebo used; per protocol analysis   | Some concerns | 11/93 lost (11.83%) | Some concerns | Appropriate, blinding of examiner not reported | Low           | Evidence of selective reporting was not detected | Some concerns |
| (Kessler et al. 2021)        | Some concerns | Computer-generated randomisation table; No information on concealment; no imbalances are apparent | High          | Single blinded; per protocol analysis | High          | 5/22 lost (22.7%)   | Some concerns | Appropriate, blinding of examiner not reported | Some concerns | Data presented in graphs rather than raw data    | High          |

| Overall risk-of-bias judgement | Criteria                                                                                                                                                                                                         |
|--------------------------------|------------------------------------------------------------------------------------------------------------------------------------------------------------------------------------------------------------------|
| Low risk of bias               | The study is judged to be at low risk of bias for all domains for this result.                                                                                                                                   |
| Some concerns                  | The study is judged to raise some concerns in at least one domain for this result, but not to be at high risk of bias for any domain.                                                                            |
| High risk of bias              | The study is judged to be at high risk of bias in at least one domain for this result. Or<br>The study is judged to have some concerns for multiple domains in a way that substantially lowers confidence in the |



|  |         |
|--|---------|
|  | result. |
|--|---------|
